# Supplementary material for: Spatiotemporal Evaluation of Regional Land Use Dynamics and Its Potential Ecosystem Impact under Carbon Neutral Pathways in the Guangdong–Hong Kong–Macao Greater Bay Area
Source: MDPI journal article supplement (doi:10.3390/rs15245749), 2023-12-15
Supplement: s1 [file s1]

Archive with 1 entries (1 files):
- remotesensing-2704786-supplementary.pdf
