# Supplementary material for: Spatiotemporal Evaluation of Regional Land Use Dynamics and Its Potential Ecosystem Impact under Carbon Neutral Pathways in the Guangdong–Hong Kong–Macao Greater Bay Area
Source: MDPI journal article supplement (doi:10.3390/rs15245749), 2023-12-15
Supplement: s1 [file s1 › remotesensing-2704786-supplementary.pdf]

## Supporting Information for

# Spatiotemporal Evaluation of Regional Land Use Dynamics and Its Potential Ecosystem Impact under Carbon Neutral Pathways in the Guangdong–Hong Kong–Macao Greater Bay Area

Haoming Chen<sup>1</sup>, Na Dong<sup>1,2,\*</sup>, Xun Liang<sup>3</sup>, Huabing Huang<sup>1,2</sup>

**Table S1.** Reclassification of land-use data from multiple models

| PLUS (6 classes) | Landsat land-use data (15 classes)                   |
|------------------|------------------------------------------------------|
| 1 Cropland       | 10 Rainfed cropland                                  |
|                  | 20 Irrigated cropland                                |
| 2 Grassland      | 11 Herbaceous covers                                 |
| 3 Forest         | 51 Open evergreen broadleaved forest                 |
|                  | 52 Closed evergreen broadleaved forest               |
|                  | 61 Open deciduous broadleaved forest (0.15<fc<0.4)   |
|                  | 62 Closed deciduous broadleaved forest (fc>0.4)      |
|                  | 71 Open evergreen needle-leaved forest (0.15<fc<0.4) |
|                  | 72 Closed evergreen needle-leaved forest (fc>0.4)    |
| 4 Shrubland      | 120 Shrubland                                        |
|                  | 121 Evergreen shrubland                              |
| 5 Urban          | 190 Impervious surfaces                              |
| 6 Other          | 180 Wetlands                                         |
|                  | 210 Water bodies                                     |
|                  | 220 Permanent ice and snow                           |

**Table S2.** The information on driving factors

| Driving factors   | Spatial resolution | Data sources                                                                                                                                                                                                                                                             |
|-------------------|--------------------|--------------------------------------------------------------------------------------------------------------------------------------------------------------------------------------------------------------------------------------------------------------------------|
| Precipitation     | 1000 m             | The Data Center for Resources and Environmental Sciences<br>of the Chinese Academy of Sciences                                                                                                                                                                           |
| Temperature       |                    |                                                                                                                                                                                                                                                                          |
| GDP               |                    |                                                                                                                                                                                                                                                                          |
| Population        |                    |                                                                                                                                                                                                                                                                          |
| Solar radiation   | ~500 m             | EARTHDATA<br>( <a href="https://lpdaac.usgs.gov/products/mcd43a3v061/">https://lpdaac.usgs.gov/products/mcd43a3v061/</a> )                                                                                                                                               |
| VPD               | 1000 m             | Climate Data Store<br>( <a href="https://cds.climate.copernicus.eu/cdsapp#!/dataset/reanalysis-era5-land?tab=form">https://cds.climate.copernicus.eu/cdsapp#!/dataset/reanalysis-era5-land?tab=form</a> )                                                                |
| DEM               | 30 m               | The geospatial data cloud ( <a href="https://www.gscloud.cn">https://www.gscloud.cn</a> )                                                                                                                                                                                |
| Road network data | /                  | OpenStreetMap ( <a href="http://www.openstreetmap.org">www.openstreetmap.org</a> )                                                                                                                                                                                       |
| River data        |                    |                                                                                                                                                                                                                                                                          |
| Railway data      |                    |                                                                                                                                                                                                                                                                          |
| Soil type data    | 1000m              | Harmonized World Soil Database ( <a href="https://www.fao.org/soils-portal/soil-survey/soil-maps-and-databases/harmonized-world-soil-database-v12/en/">https://www.fao.org/soils-portal/soil-survey/soil-maps-and-databases/harmonized-world-soil-database-v12/en/</a> ) |

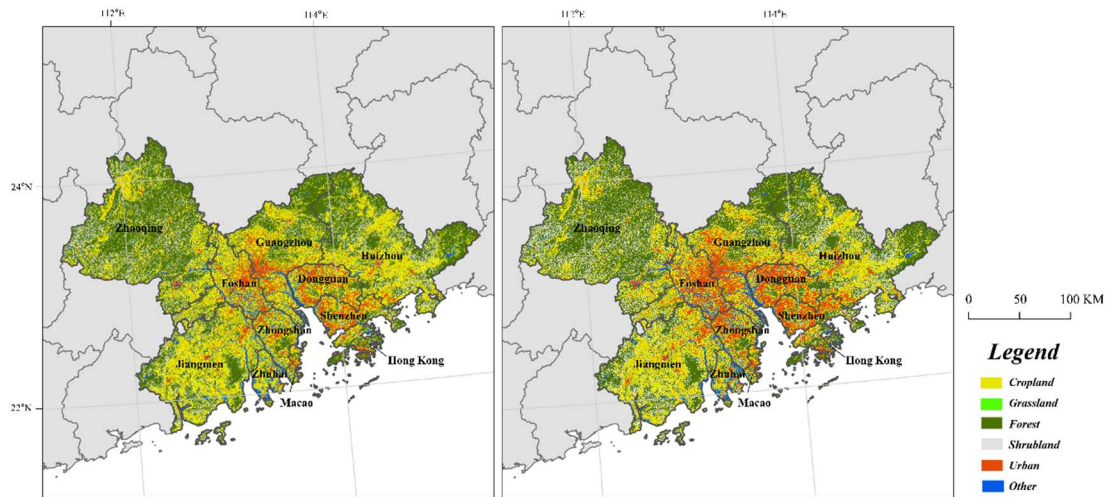

(a) (b)

**Fig.S1.** (a) Land cover map of 2000; (b) land cover map of 2010.

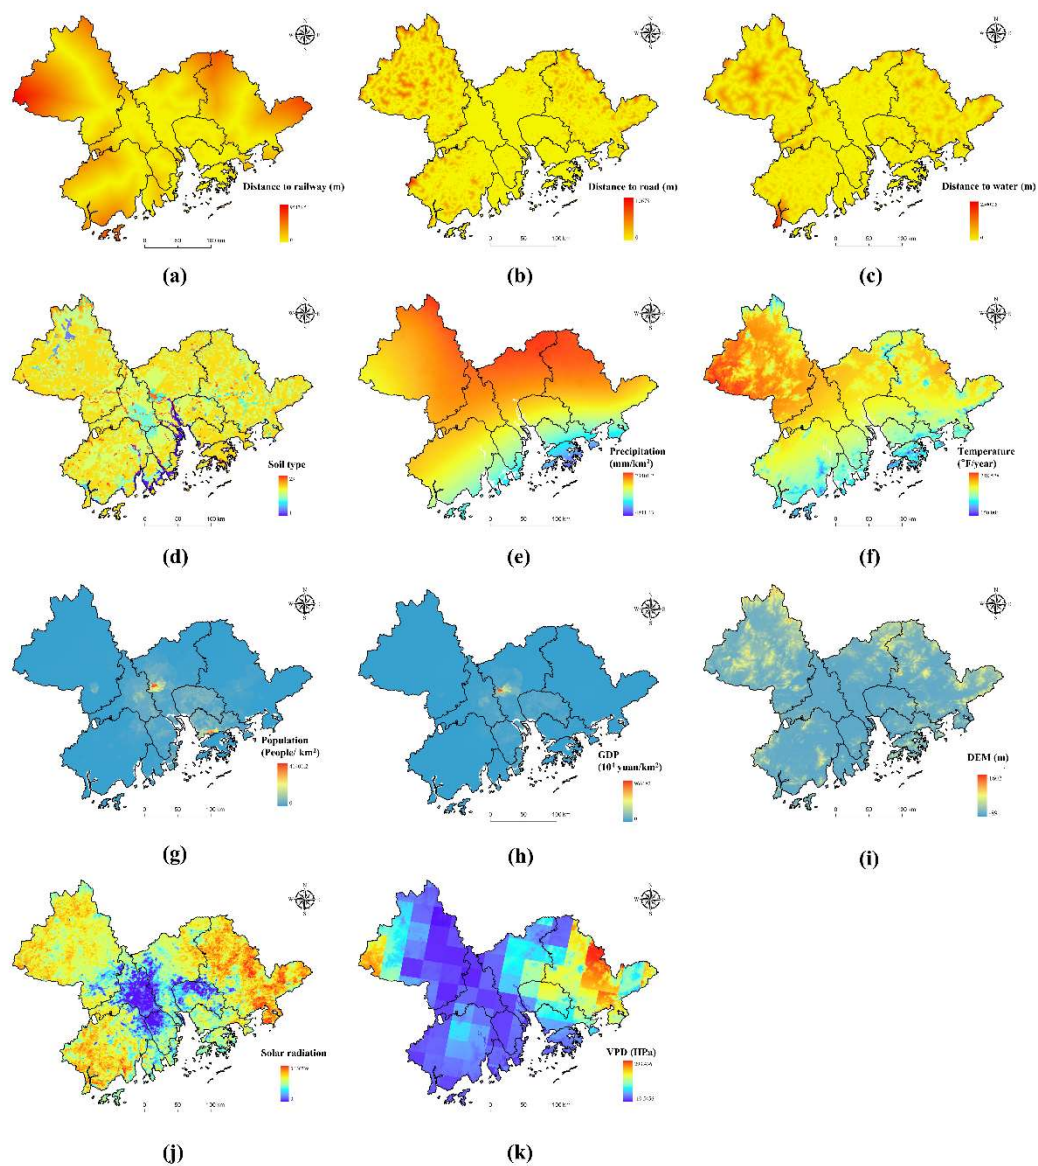

**Fig. S2.** Maps of nine driving factors: (a) distance to railway; (b) distance to road; (c) distance to water; (d) soil type; (e) precipitation; (f) temperature; (g) population; (h) GDP; (i) DEM; (j) solar radiation; (k) VPD.
